# Supplementary material for: Enhancing Early Childhood Educators’ Skills in Co-regulating Children’s Emotions: A Collaborative Learning Program
Source: Frontiers journal article supplement (doi:10.3389/feduc.2022.865161), 2022-04-26
Supplement: Data_Sheet_1.zip [file Data_Sheet_1.zip]

# TunTuVa project

 Fields marked with an asterisk (\*) are required

## Part 4: Video samples

You will now see three different situations from everyday ECEC life. Your task is to interpret the situations by answering the following questions:

- \*What caught your attention in the situation in terms of emotions and emotion regulation?,
- \*How do children act in the situation in relation to emotions or emotion regulation?,
- \*What kind of support does the adult give to children in terms of emotions and emotion regulation?,
- \*How does the adult monitor children's activities in the situation?,
- \*How else could the adult have acted in the situation and why?,
- \*What do you think the children learned in the situation?

Please answer all questions. The writing style is free (the research focus will be on the subject matters of the answer, not in the style of the text). The questions are identical after each video. If needed, you can re-watch each video once. There is no right or wrong answers to the questionnaire. Please answer honestly, not spending excessive time thinking about your answers.

**Example 1) You will now see a video clip "Playtime". You can access the video below:**

**\*\*Video clip 1\*\***

1. What caught your attention in the situation in terms of emotions and emotion regulation? \*

---

---

---

---

---

2. How do children act in the situation in relation to emotions or emotion regulation? \*

---

---

---

---

---

3. What kind of support does the adult give to children in terms of emotions and emotion regulation? \*

---

---

---

---

---

4. How does the adult monitor children's activities in the situation? \*

---

---

---

---

---

5. How else could the adult have acted in the situation and why? \*

---

---

---

---

---

6. What do you think the children learned in the situation? \*

---

---

---

---

---

**Example 2) You will now see a video clip "Lunch queue". You can access the video below:**

**\*\*Video clip 2\*\***

1. What caught your attention in the situation in terms of emotions and emotion regulation? \*

---

---

---

---

---

2. How do children act in the situation in relation to emotions or emotion regulation? \*

---

---

---

---

---

3. What kind of support does the adult give to children in terms of emotions and emotion regulation? \*

---

---

---

---

---

4. How does the adult monitor children's activities in the situation? \*

---

---

---

---

---

5. How else could the adult have acted in the situation and why? \*

---

---

---

---

---

6. What do you think the children learned in the situation? \*

---

---

---

---

---

**Example 3) You will now see a video clip "Gymnastics activities". You can access the video below:**

**\*\*Video clip 3\*\***

1. What caught your attention in the situation in terms of emotions and emotion regulation? \*

---

---

---

---

---

2. How do children act in the situation in relation to emotions or emotion regulation? \*

---

---

---

---

---

3. What kind of support does the adult give to children in terms of emotions and emotion regulation? \*

---

---

---

---

---

4. How does the adult monitor children's activities in the situation? \*

---

---

---

---

---

5. How else could the adult have acted in the situation and why? \*

---

---

---

---

---

6. What do you think the children learned in the situation? \*

---

---

---

---

---
